# Supplementary material for: Variable dimensionality of the anion framework in four new borophosphates and fluoroborophosphates with short cutoff edges
Source: Royal Society of Chemistry journal article supplement (doi:10.1039/d1dt04266a), 2022-01-01

## Electronic Supplementary Information

### Variable Dimensionality of Anion Framework in Four New Borophosphates and Fluoroborophosphates with Short Cutoff Edge

Ruonan Zhang,<sup>†a,b</sup> Siru Guo,<sup>†a,b</sup> Xuping Wang,<sup>\*a,c</sup> Rong Yang,<sup>a,b</sup> Zhen Chen,<sup>a,b</sup> Wenyao Zhang,<sup>a,b</sup>  
Fangfang Zhang,<sup>a</sup> Zhiyong Guo,<sup>d</sup> Shujuan Han,<sup>\*a</sup> Zhihua Yang<sup>a</sup>

<sup>a</sup>CAS Key Laboratory of Functional Materials and Devices for Special Environments, Xinjiang  
Technical Institute of Physics & Chemistry, CAS; Xinjiang Key Laboratory of Electronic  
Information Materials and Devices, 40-1 South Beijing Road, Urumqi 830011, China.

<sup>b</sup>Center of Materials Science and Optoelectronics Engineering, University of Chinese Academy of  
Sciences, Beijing 100049, China.

<sup>c</sup>Advanced Materials Institute, Qilu University of Technology (Shandong Academy of Sciences),  
Jinan, 250014, China.

<sup>d</sup>Xuchang Quality and Technical Supervision, Inspection and Testing Center, National Quality  
Supervision and Inspection Center for Ceramic Products of China, West Section of Longxing  
Road, Dongcheng District, Xuchang 461000, China.

\*Corresponding author, E-mail: [hansj@ms.xjb.ac.cn](mailto:hansj@ms.xjb.ac.cn)

Table S1. Crystal data and structure refinement for four new compounds.

|                                                                    |                                                                                               |                                                                                               |                                                                                              |                                                                                              |
|--------------------------------------------------------------------|-----------------------------------------------------------------------------------------------|-----------------------------------------------------------------------------------------------|----------------------------------------------------------------------------------------------|----------------------------------------------------------------------------------------------|
| Empirical formula                                                  | Cs <sub>3</sub> B <sub>3</sub> P <sub>4</sub> O <sub>16</sub>                                 | Li(NH <sub>4</sub> ) <sub>2</sub> B <sub>3</sub> P <sub>4</sub> O <sub>16</sub>               | K <sub>4</sub> B <sub>2</sub> P <sub>2</sub> O <sub>9</sub> F <sub>2</sub>                   | Rb <sub>3</sub> B <sub>2</sub> PO <sub>5</sub> F <sub>4</sub>                                |
| Formula weight                                                     | 811.04                                                                                        | 455.33                                                                                        | 421.96                                                                                       | 465                                                                                          |
| Temperature                                                        | 302.0 K                                                                                       | 300.0 K                                                                                       | 302.0                                                                                        | 298.0 K                                                                                      |
| Wavelength                                                         | 0.71073 Å                                                                                     | 0.71073 Å                                                                                     | 0.71073 Å                                                                                    | 0.71073 Å                                                                                    |
| Crystal system,<br>space group                                     | Monoclinic,<br><i>P2<sub>1</sub>/c</i>                                                        | Monoclinic,<br><i>P2<sub>1</sub>/c</i>                                                        | Monoclinic,<br><i>P2<sub>1</sub>/c</i>                                                       | Monoclinic,<br><i>P2<sub>1</sub>/c</i>                                                       |
| Unit cell dimensions<br>(Å)                                        | <i>a</i> =13.0515(8)<br><i>b</i> =15.3256(10)<br><i>c</i> =7.9289(5)<br><i>β</i> = 96.283(2)° | <i>a</i> =7.3237(4)<br><i>b</i> =25.6466(14)<br><i>c</i> =7.6796(4)<br><i>β</i> = 119.951(4)° | <i>a</i> =13.1574(7)<br><i>b</i> =12.3117(6)<br><i>c</i> =7.0252(4)<br><i>β</i> = 90.351(2)° | <i>a</i> =7.3447(6)<br><i>b</i> =10.3803(8)<br><i>c</i> =12.3628(9)<br><i>β</i> = 94.699(3)° |
| Volume (Å <sup>3</sup> )                                           | 1574.43(17)                                                                                   | 1249.81(12)                                                                                   | 1137.99(10)                                                                                  | 939.37(13)                                                                                   |
| Z, Calculated density<br>(g·cm <sup>-3</sup> )                     | 4, 3.417                                                                                      | 4, 2.420                                                                                      | 4, 2.463                                                                                     | 4, 3.288                                                                                     |
| Absorption coefficient                                             | 7.398 mm <sup>-1</sup>                                                                        | 0.713 mm <sup>-1</sup>                                                                        | 1.908 mm <sup>-1</sup>                                                                       | 15.794 mm <sup>-1</sup>                                                                      |
| <i>F</i> (000)                                                     | 1472                                                                                          | 912                                                                                           | 824                                                                                          | 848                                                                                          |
| Theta range for data<br>collection (°)                             | 2.057 to<br>25.023                                                                            | 3.163 to<br>27.489                                                                            | 1.548 to<br>27.101                                                                           | 2.566 to<br>27.531                                                                           |
| Limiting indices                                                   | -16 ≤ <i>h</i> ≤ 16,<br>-19 ≤ <i>k</i> ≤ 17,<br>-10 ≤ <i>l</i> ≤ 10                           | -9 ≤ <i>h</i> ≤ 9,<br>-33 ≤ <i>k</i> ≤ 33,<br>-9 ≤ <i>l</i> ≤ 9                               | -16 ≤ <i>h</i> ≤ 16,<br>-15 ≤ <i>k</i> ≤ 15,<br>-9 ≤ <i>l</i> ≤ 9                            | -9 ≤ <i>h</i> ≤ 9, -13<br>≤ <i>k</i> ≤ 13, -16 ≤<br><i>l</i> ≤ 16                            |
| Reflections<br>collected/unique                                    | 2780 / 2780<br>[ <i>R</i> (int)=0.0381]                                                       | 12631 / 2865<br>[ <i>R</i> (int)=0.0754]                                                      | 18995 / 2501<br>[ <i>R</i> (int)=0.0762]                                                     | 25049 / 2168<br>[ <i>R</i> (int)=0.1172]                                                     |
| Completeness to theta                                              | 99.6%                                                                                         | 99.7%                                                                                         | 100.0%                                                                                       | 100.0%                                                                                       |
| Max. and min. transmission                                         | 0.5580 and<br>0.4200                                                                          | 0.7455 and<br>0.6537                                                                          | 0.7407 and<br>0.6540                                                                         | 0.4891 and<br>0.3118                                                                         |
| Data/restraints/parameters                                         | 2780 / 0 / 231                                                                                | 2865 / 38 / 259                                                                               | 2501 / 0 / 173                                                                               | 2168 / 0 / 137                                                                               |
| Goodness-of-fit on <i>F</i> <sup>2</sup>                           | 1.104                                                                                         | 1.034                                                                                         | 1.048                                                                                        | 1.039                                                                                        |
| Final <i>R</i> indices<br>[ <i>I</i> >2σ( <i>I</i> )] <sup>a</sup> | <i>R</i> <sub>1</sub> = 0.0420,<br><i>wR</i> <sub>2</sub> = 0.0867                            | <i>R</i> <sub>1</sub> = 0.0384,<br><i>wR</i> <sub>2</sub> = 0.0868                            | <i>R</i> <sub>1</sub> = 0.0542,<br><i>wR</i> <sub>2</sub> = 0.1588                           | <i>R</i> <sub>1</sub> = 0.0331,<br><i>wR</i> <sub>2</sub> = 0.0703                           |
| <i>R</i> indices (all data) <sup>a</sup>                           | <i>R</i> <sub>1</sub> = 0.0493,<br><i>wR</i> <sub>2</sub> = 0.0867                            | <i>R</i> <sub>1</sub> = 0.0592,<br><i>wR</i> <sub>2</sub> = 0.0946                            | <i>R</i> <sub>1</sub> = 0.0704, <i>wR</i> <sub>2</sub><br>= 0.1724                           | <i>R</i> <sub>1</sub> = 0.0451,<br><i>wR</i> <sub>2</sub> = 0.0760                           |
| Extinction coefficient                                             | 0.00046(10)                                                                                   | N/A                                                                                           | N/A                                                                                          | 0.0036(5)                                                                                    |
| Largest diff. peak and hole<br>(e·Å <sup>-3</sup> )                | 1.443 and<br>-0.992                                                                           | 0.376 and<br>-0.610                                                                           | 1.522 and<br>-0.717                                                                          | 0.712 and<br>-0.698                                                                          |

<sup>a</sup>  $R_1 = \sum ||F_o| - |F_c| || / \sum |F_o|$  and  $wR_2 = [\sum w(F_o^2 - F_c^2)^2 / \sum wF_o^4]^{1/2}$  for  $F_o^2 > 2\sigma(F_o^2)$

Table S2. Atomic coordinates ( $\times 10^4$ ) and equivalent isotropic displacement parameters ( $\text{\AA}^2 \times 10^3$ ) for four title compounds. U(eq) is defined as one third of the trace of the orthogonalized  $U_{ij}$  tensor.

| Atom<br>s                                                   | x        | y        | z        | U(eq) | BVS  |
|-------------------------------------------------------------|----------|----------|----------|-------|------|
| $\text{Cs}_3\text{B}_3\text{P}_4\text{O}_{16}$              |          |          |          |       |      |
| Cs(1)                                                       | 7592(1)  | 2348(1)  | 8690(1)  | 21(1) | 1.05 |
| Cs(2)                                                       | 5593(1)  | 8340(1)  | 3868(1)  | 33(1) | 1.07 |
| Cs(3)                                                       | 9223(1)  | 8221(1)  | 4252(1)  | 34(1) | 0.75 |
| B(1)                                                        | 7648(7)  | 4958(6)  | 7834(11) | 14(2) | 3.21 |
| B(2)                                                        | 8682(7)  | 5051(7)  | 3614(11) | 15(2) | 3.19 |
| B(3)                                                        | 5867(7)  | 5253(6)  | 3384(11) | 12(2) | 3.12 |
| P(1)                                                        | 7060(2)  | 4629(1)  | 11050(3) | 12(1) | 5.15 |
| P(2)                                                        | 9395(1)  | 4255(1)  | 6811(3)  | 12(1) | 5.26 |
| P(3)                                                        | 7392(2)  | 6220(1)  | 5214(3)  | 13(1) | 5.25 |
| P(4)                                                        | 3982(1)  | 5930(1)  | 3946(3)  | 11(1) | 5.14 |
| O(1)                                                        | 6667(4)  | 3747(4)  | 10601(8) | 22(1) | 2.02 |
| O(2)                                                        | 7377(4)  | 5170(4)  | 9546(7)  | 15(1) | 2.13 |
| O(3)                                                        | 7090(4)  | 4236(4)  | 7053(7)  | 18(1) | 2.17 |
| O(4)                                                        | 9438(5)  | 3314(4)  | 7128(8)  | 33(2) | 1.88 |
| O(5)                                                        | 8738(5)  | 4740(4)  | 8021(8)  | 28(2) | 2.10 |
| O(6)                                                        | 8979(5)  | 4427(4)  | 4967(8)  | 26(1) | 2.15 |
| O(7)                                                        | 7995(4)  | 4551(4)  | 2391(7)  | 18(1) | 2.17 |
| O(8)                                                        | 9562(4)  | 5291(5)  | 2755(8)  | 27(2) | 2.07 |
| O(9)                                                        | 8222(4)  | 5844(4)  | 4197(8)  | 24(1) | 2.06 |
| O(10)                                                       | 7475(6)  | 5790(4)  | 6963(8)  | 33(2) | 2.29 |
| O(11)                                                       | 6309(4)  | 6000(4)  | 4351(9)  | 29(2) | 2.02 |
| O(12)                                                       | 6252(4)  | 5235(4)  | 1724(7)  | 18(1) | 2.13 |
| O(13)                                                       | 6090(4)  | 4420(4)  | 4245(7)  | 22(1) | 2.12 |
| O(14)                                                       | 4745(4)  | 5369(4)  | 3071(7)  | 16(1) | 2.06 |
| O(15)                                                       | 4177(4)  | 6875(4)  | 4014(8)  | 22(1) | 1.99 |
| O(16)                                                       | 7516(5)  | 7168(4)  | 5424(8)  | 25(1) | 1.82 |
| $\text{Li}(\text{NH}_4)_2\text{B}_3\text{P}_4\text{O}_{16}$ |          |          |          |       |      |
| Li(1)                                                       | 6844(8)  | -3835(2) | 5334(8)  | 18(1) | 1.08 |
| N(1)                                                        | -4472(5) | -4991(1) | 3106(4)  | 22(1) | –    |
| N(2)                                                        | -5276(5) | -2592(1) | 2583(4)  | 28(1) | –    |
| B(1)                                                        | -196(5)  | -3010(1) | 11945(5) | 9(1)  | 3.12 |
| B(2)                                                        | -598(5)  | -4396(1) | 1413(5)  | 10(1) | 3.1  |
| B(3)                                                        | 2464(5)  | -3660(1) | 8126(5)  | 9(1)  | 3.12 |
| P(1)                                                        | -672(1)  | -5463(1) | 1445(1)  | 8(1)  | 5.02 |
| P(2)                                                        | -493(1)  | -2978(1) | 8120(1)  | 8(1)  | 5.17 |
| P(3)                                                        | 6599(1)  | -3679(1) | 11135(1) | 9(1)  | 5.03 |
| P(4)                                                        | 2144(1)  | -3790(1) | 4460(1)  | 8(1)  | 5.05 |
| O(1)                                                        | -1582(3) | -4908(1) | 1280(3)  | 11(1) | 1.96 |
| O(2)                                                        | -1979(3) | -3192(1) | 12130(3) | 10(1) | 1.95 |

|       |          |          |          |       |      |
|-------|----------|----------|----------|-------|------|
| O(3)  | 1581(3)  | -3375(1) | 12796(3) | 10(1) | 1.97 |
| O(4)  | -2323(3) | -4030(1) | 265(3)   | 11(1) | 1.98 |
| O(5)  | 4624(3)  | -3452(1) | 9275(3)  | 12(1) | 1.95 |
| O(6)  | 569(3)   | -4249(1) | 3519(3)  | 12(1) | 1.99 |
| O(7)  | 1660(3)  | -3533(1) | 6011(3)  | 11(1) | 1.98 |
| O(8)  | 2434(3)  | -4220(1) | 8458(3)  | 10(1) | 1.95 |
| O(9)  | 1480(3)  | -5540(1) | 3155(3)  | 14(1) | 1.70 |
| O(10) | 1189(3)  | -3407(1) | 8844(3)  | 13(1) | 2.05 |
| O(11) | 864(3)   | -4423(1) | 624(3)   | 12(1) | 1.95 |
| O(12) | -1003(3) | -2911(1) | 9810(3)  | 15(1) | 2.05 |
| O(13) | 656(3)   | -2524(1) | 13065(3) | 13(1) | 1.97 |
| O(14) | 6106(3)  | -3938(1) | 12562(3) | 15(1) | 1.76 |
| O(15) | -2449(3) | -3090(1) | 6210(3)  | 17(1) | 1.68 |
| O(16) | 4331(3)  | -3977(1) | 5337(3)  | 16(1) | 1.80 |

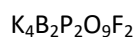

|      |         |         |          |       |      |
|------|---------|---------|----------|-------|------|
| K(1) | 3365(1) | 3577(1) | 1172(2)  | 30(1) | 1.08 |
| K(2) | 1675(1) | 8742(1) | 6589(2)  | 28(1) | 1.06 |
| K(3) | 580(1)  | 3538(1) | 13689(2) | 27(1) | 0.86 |
| K(4) | 4406(1) | 6342(1) | 13793(2) | 24(1) | 0.86 |
| B(1) | 2957(5) | 4298(5) | 6216(10) | 24(1) | 3.08 |
| B(2) | 2009(5) | 5897(5) | 6409(10) | 26(1) | 3.07 |
| P(1) | 1262(1) | 4175(1) | 8348(2)  | 25(1) | 5.01 |
| P(2) | 3755(1) | 5900(1) | 8408(2)  | 24(1) | 5.02 |
| O(1) | 345(4)  | 3613(4) | 7547(8)  | 47(1) | 1.95 |
| O(2) | 2245(4) | 3670(3) | 7392(7)  | 37(1) | 2.01 |
| O(3) | 1395(4) | 4131(4) | 10445(7) | 38(1) | 2.08 |
| O(4) | 1263(3) | 5402(4) | 7692(7)  | 40(1) | 2.10 |
| O(5) | 2438(3) | 5116(3) | 5144(5)  | 29(1) | 1.91 |
| O(6) | 3779(3) | 4750(4) | 7386(7)  | 39(1) | 2.12 |
| O(7) | 2789(3) | 6479(4) | 7508(8)  | 40(1) | 2.00 |
| O(8) | 4671(4) | 6526(4) | 7826(8)  | 44(1) | 1.97 |
| O(9) | 3612(4) | 5745(4) | 10483(7) | 41(1) | 2.07 |
| F(1) | 3428(3) | 3532(3) | 4989(5)  | 37(1) | 1.04 |
| F(2) | 1473(3) | 6708(3) | 5351(5)  | 34(1) | 1.09 |

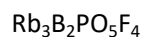

|       |          |         |         |       |      |
|-------|----------|---------|---------|-------|------|
| Rb(1) | 2640(1)  | 5241(1) | 3518(1) | 26(1) | 1.21 |
| Rb(2) | -3956(1) | 6630(1) | 9119(1) | 28(1) | 1.13 |
| Rb(3) | 9137(1)  | 2908(1) | 9268(1) | 28(1) | 1.00 |
| B(1)  | 3689(7)  | 3793(5) | 8160(4) | 18(1) | 3.10 |
| B(2)  | 2491(7)  | 4769(5) | 6373(4) | 20(1) | 3.04 |
| P(1)  | 1265(2)  | 5754(1) | 8214(1) | 22(1) | 5.09 |
| O(1)  | 1148(4)  | 5455(3) | 6962(3) | 24(1) | 2.25 |
| O(2)  | -589(5)  | 5592(3) | 8596(3) | 26(1) | 2.02 |
| O(3)  | 2151(5)  | 7019(3) | 8445(3) | 35(1) | 1.91 |

|      |         |         |         |       |      |
|------|---------|---------|---------|-------|------|
| O(4) | 2545(5) | 4652(4) | 8728(3) | 33(1) | 2.17 |
| O(5) | 3763(5) | 4051(3) | 7052(3) | 28(1) | 2.17 |
| F(1) | 3426(4) | 5687(3) | 5765(2) | 31(1) | 1.03 |
| F(2) | 1518(5) | 3977(3) | 5588(3) | 36(1) | 1.01 |
| F(3) | 3075(5) | 2514(3) | 8343(3) | 48(1) | 0.97 |
| F(4) | 5474(4) | 3856(3) | 8695(3) | 37(1) | 1.08 |

---

Table S3. Selected bond distances (Å) and angles (deg) for Cs<sub>3</sub>B<sub>3</sub>P<sub>4</sub>O<sub>16</sub>.

|                      |            |                  |           |
|----------------------|------------|------------------|-----------|
| Cs(1)-O(3)           | 3.210(6)   | B(1)-O(10)       | 1.456(11) |
| Cs(1)-O(1)           | 2.957(6)   | B(2)-O(9)        | 1.452(11) |
| Cs(1)-O(1)#2         | 3.102(6)   | B(2)-O(6)        | 1.458(11) |
| Cs(1)-O(7)#3         | 3.150(6)   | B(2)-O(8)        | 1.445(10) |
| Cs(1)-O(13)#3        | 3.401(6)   | B(2)-O(7)        | 1.464(11) |
| Cs(1)-O(15)#1        | 3.175(6)   | B(3)-O(13)       | 1.462(11) |
| Cs(1)-O(15)#4        | 3.203(6)   | B(3)-O(11)       | 1.461(11) |
| Cs(1)-O(6)#3         | 3.362(6)   | B(3)-O(14)       | 1.469(10) |
| Cs(1)-O(4)           | 3.192(7)   | B(3)-O(12)       | 1.460(10) |
| Cs(2)-O(14)#6        | 3.475(6)   | P(1)-O(2)        | 1.546(5)  |
| Cs(2)-O(2)#5         | 3.263(6)   | P(1)-O(12)#11    | 1.544(6)  |
| Cs(2)-O(12)#7        | 3.195(6)   | P(1)-O(1)        | 1.476(6)  |
| Cs(2)-O(1)#8         | 3.088(6)   | P(1)-O(7)#11     | 1.533(6)  |
| Cs(2)-O(13)#6        | 3.532(6)   | P(2)-O(8)#10     | 1.534(6)  |
| Cs(2)-O(15)          | 2.919(6)   | P(2)-O(5)        | 1.546(7)  |
| Cs(2)-O(16)          | 3.220(6)   | P(2)-O(6)        | 1.526(6)  |
| Cs(2)-O(10)#5        | 3.303(7)   | P(2)-O(4)        | 1.465(7)  |
| Cs(3)-O(2)#5         | 3.472(5)   | P(3)-O(11)       | 1.539(6)  |
| Cs(3)-O(5)#5         | 3.313(7)   | P(3)-O(9)        | 1.532(6)  |
| Cs(3)-O(16)          | 2.981(6)   | P(3)-O(16)       | 1.469(6)  |
| Cs(3)-O(10)#5        | 3.144(7)   | P(3)-O(10)       | 1.529(6)  |
| Cs(3)-O(4)#9         | 3.196(7)   | P(4)-O(14)       | 1.537(6)  |
| Cs(3)-O(4)#10        | 3.194(7)   | P(4)-O(3)#4      | 1.552(6)  |
| B(1)-O(2)            | 1.476(10)  | P(4)-O(13)#4     | 1.544(6)  |
| B(1)-O(3)            | 1.428(11)  | P(4)-O(15)       | 1.469(6)  |
| B(1)-O(5)            | 1.453(11)  |                  |           |
| O(3)-Cs(1)-O(13)#3   | 132.53(14) | O(5)-B(1)-O(2)   | 106.7(7)  |
| O(3)-Cs(1)-O(6)#3    | 158.53(15) | O(5)-B(1)-O(10)  | 110.4(7)  |
| O(1)-Cs(1)-O(3)      | 58.46(16)  | O(10)-B(1)-O(2)  | 101.7(7)  |
| O(1)#2-Cs(1)-O(3)    | 97.12(15)  | O(8)-B(2)-O(7)   | 106.4(7)  |
| O(1)-Cs(1)-O(1)#2    | 130.6(2)   | O(8)-B(2)-O(9)   | 108.4(7)  |
| O(1)-Cs(1)-O(7)#3    | 158.30(15) | O(8)-B(2)-O(6)   | 110.7(7)  |
| O(1)#2-Cs(1)-O(7)#3  | 46.11(14)  | O(9)-B(2)-O(7)   | 113.8(7)  |
| O(1)#2-Cs(1)-O(13)#3 | 59.44(15)  | O(9)-B(2)-O(6)   | 113.6(7)  |
| O(1)-Cs(1)-O(13)#3   | 103.78(15) | O(6)-B(2)-O(7)   | 103.7(7)  |
| O(1)-Cs(1)-O(15)#1   | 60.60(15)  | O(12)-B(3)-O(14) | 106.6(6)  |
| O(1)-Cs(1)-O(15)#4   | 76.64(16)  | O(12)-B(3)-O(13) | 109.5(7)  |
| O(1)#2-Cs(1)-O(15)#4 | 58.87(15)  | O(12)-B(3)-O(11) | 109.5(7)  |
| O(1)#2-Cs(1)-O(15)#1 | 94.87(16)  | O(13)-B(3)-O(14) | 109.2(7)  |
| O(1)-Cs(1)-O(6)#3    | 131.97(16) | O(11)-B(3)-O(14) | 108.8(7)  |
| O(1)#2-Cs(1)-O(6)#3  | 87.15(15)  | O(11)-B(3)-O(13) | 113.0(7)  |
| O(1)#2-Cs(1)-O(4)    | 100.92(17) | O(1)-P(1)-O(2)   | 114.9(3)  |

|                       |            |                       |          |
|-----------------------|------------|-----------------------|----------|
| O(1)-Cs(1)-O(4)       | 103.32(17) | O(1)-P(1)-O(12)#11    | 113.6(3) |
| O(7)#3-Cs(1)-O(3)     | 137.29(15) | O(1)-P(1)-O(7)#11     | 109.0(3) |
| O(7)#3-Cs(1)-O(13)#3  | 54.93(14)  | O(7)#11-P(1)-O(2)     | 108.5(3) |
| O(7)#3-Cs(1)-O(15)#1  | 97.71(15)  | O(7)#11-P(1)-O(12)#11 | 109.2(3) |
| O(7)#3-Cs(1)-O(15)#4  | 104.99(14) | O(6)-P(2)-O(8)#10     | 110.5(4) |
| O(7)#3-Cs(1)-O(6)#3   | 41.17(14)  | O(6)-P(2)-O(5)        | 110.4(4) |
| O(7)#3-Cs(1)-O(4)     | 98.12(16)  | O(4)-P(2)-O(8)#10     | 113.1(4) |
| O(15)#4-Cs(1)-O(3)    | 45.08(14)  | O(4)-P(2)-O(5)        | 112.4(4) |
| O(15)#1-Cs(1)-O(3)    | 107.99(14) | O(4)-P(2)-O(6)        | 109.7(4) |
| O(15)#4-Cs(1)-O(13)#3 | 90.00(15)  | O(8)#10-P(2)-O(5)     | 100.5(4) |
| O(15)#1-Cs(1)-O(13)#3 | 43.84(14)  | O(9)-P(3)-O(11)       | 110.6(4) |
| O(15)#1-Cs(1)-O(15)#4 | 87.31(15)  | O(16)-P(3)-O(11)      | 110.6(4) |
| O(15)#4-Cs(1)-O(6)#3  | 145.83(15) | O(16)-P(3)-O(9)       | 110.9(4) |
| O(15)#1-Cs(1)-O(6)#3  | 92.51(15)  | O(16)-P(3)-O(10)      | 109.1(4) |
| O(15)#1-Cs(1)-O(4)    | 162.81(17) | O(10)-P(3)-O(11)      | 106.2(4) |
| O(6)#3-Cs(1)-O(13)#3  | 67.37(15)  | O(10)-P(3)-O(9)       | 109.3(4) |
| O(4)-Cs(1)-O(3)       | 63.54(15)  | O(12)#11-P(1)-O(2)    | 101.3(3) |
| O(4)-Cs(1)-O(13)#3    | 152.87(16) | O(14)-P(4)-O(3)#4     | 105.6(3) |
| O(4)-Cs(1)-O(15)#4    | 95.00(16)  | O(14)-P(4)-O(13)#4    | 109.4(3) |
| O(4)-Cs(1)-O(6)#3     | 95.01(16)  | O(13)#4-P(4)-O(3)#4   | 105.9(3) |
| O(3)-B(1)-O(2)        | 114.0(7)   | O(15)-P(4)-O(14)      | 116.7(3) |
| O(3)-B(1)-O(5)        | 108.3(7)   | O(15)-P(4)-O(3)#4     | 108.9(3) |
| O(3)-B(1)-O(10)       | 115.3(7)   | O(15)-P(4)-O(13)#4    | 109.7(4) |

Symmetry transformations used to generate equivalent atoms:

|                           |                          |                       |                           |
|---------------------------|--------------------------|-----------------------|---------------------------|
| #1 $-x+1, y-1/2, -z+3/2$  | #2 $x, -y+1/2, z-1/2$    | #3 $x, -y+1/2, z+1/2$ | #4 $-x+1, -y+1, -z+1$     |
| #5 $x, -y+3/2, z-1/2$     | #6 $-x+1, y+1/2, -z+1/2$ | #7 $x, -y+3/2, z+1/2$ | #8 $-x+1, y+1/2, -z+3/2$  |
| #9 $-x+2, y+1/2, -z+3/2$  | #10 $-x+2, -y+1, -z+1$   | #11 $x, y, z+1$       | #12 $-x+2, y-1/2, -z+3/2$ |
| #13 $-x+1, y-1/2, -z+1/2$ | #14 $x, y, z-1$          |                       |                           |

Table S4. Selected bond lengths (Å) and angles (deg.) for Li(NH<sub>4</sub>)<sub>2</sub>B<sub>3</sub>P<sub>4</sub>O<sub>16</sub>.

|                       |          |                     |            |
|-----------------------|----------|---------------------|------------|
| Li(1)-O(9)#2          | 1.998(5) | P(1)-O(1)           | 1.5509(19) |
| Li(1)-O(14)#3         | 1.934(5) | P(1)-O(8)#4         | 1.558(2)   |
| Li(1)-O(15)#1         | 2.008(5) | P(1)-O(9)           | 1.4760(19) |
| Li(1)-O(16)           | 1.876(6) | P(1)-O(11)#5        | 1.5519(19) |
| B(1)-O(2)             | 1.458(4) | P(2)-O(10)          | 1.5335(19) |
| B(1)-O(3)             | 1.463(3) | P(2)-O(12)          | 1.529(2)   |
| B(1)-O(12)            | 1.462(3) | P(2)-O(13)#6        | 1.550(2)   |
| B(1)-O(13)            | 1.468(3) | P(2)-O(15)          | 1.480(2)   |
| B(2)-O(1)             | 1.474(4) | P(3)-O(2)#1         | 1.5617(19) |
| B(2)-O(4)             | 1.463(4) | P(3)-O(4)#7         | 1.550(2)   |
| B(2)-O(6)             | 1.454(3) | P(3)-O(5)           | 1.5521(19) |
| B(2)-O(11)            | 1.472(4) | P(3)-O(14)          | 1.472(2)   |
| B(3)-O(5)             | 1.474(4) | P(4)-O(3)#3         | 1.5541(18) |
| B(3)-O(7)             | 1.461(3) | P(4)-O(6)           | 1.5525(19) |
| B(3)-O(8)             | 1.462(3) | P(4)-O(7)           | 1.549(2)   |
| B(3)-O(10)            | 1.453(4) | P(4)-O(16)          | 1.474(2)   |
|                       |          |                     |            |
| O(14)#3-Li(1)-O(9)#2  | 106.5(3) | O(1)-P(1)-O(8)#4    | 98.67(10)  |
| O(14)#3-Li(1)-O(15)#1 | 112.4(3) | O(1)-P(1)-O(11)#5   | 105.91(11) |
| O(16)-Li(1)-O(9)#2    | 99.4(3)  | O(9)-P(1)-O(8)#4    | 115.39(11) |
| O(16)-Li(1)-O(14)#3   | 103.9(2) | O(9)-P(1)-O(11)#5   | 113.32(12) |
| O(16)-Li(1)-O(15)#1   | 105.8(3) | O(11)#5-P(1)-O(8)#4 | 107.23(11) |
| O(2)-B(1)-O(3)        | 113.2(2) | O(10)-P(2)-O(13)#6  | 104.88(11) |
| O(2)-B(1)-O(12)       | 106.6(2) | O(12)-P(2)-O(10)    | 105.47(11) |
| O(2)-B(1)-O(13)       | 110.6(2) | O(12)-P(2)-O(13)#6  | 107.13(11) |
| O(3)-B(1)-O(13)       | 104.9(2) | O(15)-P(2)-O(10)    | 115.23(11) |
| O(12)-B(1)-O(3)       | 112.6(2) | O(15)-P(2)-O(12)    | 109.70(12) |
| O(12)-B(1)-O(13)      | 108.9(2) | O(15)-P(2)-O(13)#6  | 113.80(11) |
| O(4)-B(2)-O(1)        | 106.6(2) | O(4)#7-P(3)-O(2)#1  | 108.49(11) |
| O(4)-B(2)-O(11)       | 111.7(2) | O(4)#7-P(3)-O(5)    | 105.17(11) |
| O(6)-B(2)-O(1)        | 107.5(2) | O(5)-P(3)-O(2)#1    | 103.72(10) |
| O(6)-B(2)-O(4)        | 110.8(2) | O(14)-P(3)-O(2)#1   | 110.30(11) |
| O(6)-B(2)-O(11)       | 108.9(2) | O(14)-P(3)-O(4)#7   | 115.29(11) |
| O(11)-B(2)-O(1)       | 111.2(2) | O(14)-P(3)-O(5)     | 113.10(11) |
| O(7)-B(3)-O(5)        | 107.6(2) | O(6)-P(4)-O(3)#3    | 107.92(10) |
| O(7)-B(3)-O(8)        | 112.3(2) | O(7)-P(4)-O(3)#3    | 105.81(10) |
| O(8)-B(3)-O(5)        | 110.9(2) | O(7)-P(4)-O(6)      | 106.11(11) |
| O(10)-B(3)-O(5)       | 108.2(2) | O(16)-P(4)-O(3)#3   | 112.42(11) |
| O(10)-B(3)-O(7)       | 110.2(2) | O(16)-P(4)-O(6)     | 110.53(12) |



---

|                 |          |                 |            |
|-----------------|----------|-----------------|------------|
| O(10)-B(3)-O(8) | 107.7(2) | O(16)-P(4)-O(7) | 113.66(11) |
|-----------------|----------|-----------------|------------|

---

Symmetry transformations used to generate equivalent atoms:

|                      |                     |              |                   |                 |
|----------------------|---------------------|--------------|-------------------|-----------------|
| #1 $x+1,y,z$         | #2 $-x+1,-y-1,-z+1$ | #3 $x,y,z-1$ | #4 $-x,-y-1,-z+1$ | #5 $-x,-y-1,-z$ |
| #6 $x,-y-1/2,z-1/2$  | #7 $x+1,y,z+1$      | #8 $x-1,y,z$ | #9 $x,y,z+1$      | #10 $x-1,y,z-1$ |
| #11 $x,-y-1/2,z+1/2$ |                     |              |                   |                 |

Table S5. Selected bond lengths (Å) and angles (deg.) for K<sub>4</sub>B<sub>2</sub>P<sub>2</sub>O<sub>9</sub>F<sub>2</sub>.

|                    |            |                    |            |
|--------------------|------------|--------------------|------------|
| K(1)-O(2)#2        | 3.031(5)   | K(4)-O(5)#8        | 3.148(5)   |
| K(1)-O(2)#1        | 3.251(4)   | K(4)-O(6)#8        | 3.304(5)   |
| K(1)-O(3)#2        | 2.726(5)   | K(4)-O(6)#10       | 2.867(4)   |
| K(1)-O(6)#2        | 3.078(5)   | K(4)-O(7)#8        | 3.382(5)   |
| K(1)-O(8)#3        | 2.676(5)   | K(4)-O(8)#8        | 2.861(6)   |
| K(1)-O(9)#2        | 2.733(5)   | K(4)-O(8)#4        | 2.734(5)   |
| K(1)-F(1)          | 2.683(4)   | K(4)-O(9)          | 2.647(5)   |
| K(1)-F(1)#1        | 2.727(4)   | K(4)-F(1)#10       | 2.975(4)   |
| K(2)-O(1)#6        | 2.735(5)   | B(1)-O(2)          | 1.472(8)   |
| K(2)-O(3)#5        | 2.764(5)   | B(1)-O(5)          | 1.428(8)   |
| K(2)-O(4)#5        | 2.980(5)   | B(1)-O(6)          | 1.464(8)   |
| K(2)-O(5)#4        | 3.032(4)   | B(1)-F(1)          | 1.422(7)   |
| K(2)-O(7)#5        | 3.239(6)   | B(2)-O(4)          | 1.469(8)   |
| K(2)-O(7)          | 3.212(5)   | B(2)-O(5)          | 1.428(8)   |
| K(2)-O(9)#5        | 2.743(5)   | B(2)-O(7)          | 1.466(8)   |
| K(2)-F(2)          | 2.664(4)   | B(2)-F(2)          | 1.428(7)   |
| K(2)-F(2)#4        | 2.715(4)   | P(1)-O(1)          | 1.498(5)   |
| K(3)-O(1)#9        | 2.783(6)   | P(1)-O(2)          | 1.588(5)   |
| K(3)-O(1)#8        | 2.731(6)   | P(1)-O(3)          | 1.483(5)   |
| K(3)-O(2)#8        | 3.395(5)   | P(1)-O(4)          | 1.579(4)   |
| K(3)-O(3)          | 2.628(5)   | P(2)-O(6)          | 1.588(4)   |
| K(3)-O(4)#7        | 2.915(5)   | P(2)-O(7)          | 1.586(5)   |
| K(3)-O(5)#8        | 3.282(5)   | P(2)-O(8)          | 1.490(5)   |
| K(3)-F(2)#7        | 2.804(4)   | P(2)-O(9)          | 1.484(5)   |
| O(2)#2-K(1)-O(2)#1 | 92.55(13)  | F(1)#1-K(1)-O(9)#2 | 150.71(14) |
| O(2)#2-K(1)-O(6)#2 | 46.59(12)  | F(1)-K(1)-F(1)#1   | 106.51(10) |
| O(3)#2-K(1)-O(2)#2 | 50.93(13)  | O(5)-B(1)-O(2)     | 111.3(5)   |
| O(3)#2-K(1)-O(2)#1 | 80.22(14)  | O(5)-B(1)-O(6)     | 112.1(5)   |
| O(3)#2-K(1)-O(6)#2 | 83.90(13)  | O(6)-B(1)-O(2)     | 110.8(5)   |
| O(3)#2-K(1)-O(9)#2 | 80.59(15)  | F(1)-B(1)-O(2)     | 105.8(4)   |
| O(3)#2-K(1)-F(1)#1 | 102.22(14) | F(1)-B(1)-O(5)     | 110.9(5)   |
| O(6)#2-K(1)-O(2)#1 | 135.22(13) | F(1)-B(1)-O(6)     | 105.6(5)   |
| O(8)#3-K(1)-O(2)#2 | 134.07(15) | O(5)-B(2)-O(4)     | 111.7(5)   |
| O(8)#3-K(1)-O(2)#1 | 109.18(14) | O(5)-B(2)-O(7)     | 112.2(5)   |
| O(8)#3-K(1)-O(3)#2 | 167.55(16) | O(5)-B(2)-F(2)     | 110.0(5)   |
| O(8)#3-K(1)-O(6)#2 | 94.25(14)  | O(7)-B(2)-O(4)     | 110.3(5)   |
| O(8)#3-K(1)-O(9)#2 | 88.70(15)  | F(2)-B(2)-O(4)     | 106.2(5)   |
| O(8)#3-K(1)-F(1)#1 | 90.23(15)  | F(2)-B(2)-O(7)     | 105.9(5)   |
| O(8)#3-K(1)-F(1)   | 73.28(15)  | O(1)-P(1)-O(2)     | 108.4(3)   |
| O(9)#2-K(1)-O(2)#2 | 82.28(14)  | O(1)-P(1)-O(4)     | 109.6(3)   |
| O(9)#2-K(1)-O(2)#1 | 158.78(14) | O(3)-P(1)-O(1)     | 116.5(3)   |
| O(9)#2-K(1)-O(6)#2 | 50.72(13)  | O(3)-P(1)-O(2)     | 108.3(3)   |

|                    |            |                |          |
|--------------------|------------|----------------|----------|
| F(1)-K(1)-O(2)#2   | 152.65(14) | O(3)-P(1)-O(4) | 109.0(3) |
| F(1)-K(1)-O(2)#1   | 74.36(13)  | O(4)-P(1)-O(2) | 104.4(2) |
| F(1)#1-K(1)-O(2)#2 | 77.56(12)  | O(7)-P(2)-O(6) | 103.8(2) |
| F(1)#1-K(1)-O(2)#1 | 44.37(11)  | O(8)-P(2)-O(6) | 108.6(3) |
| F(1)-K(1)-O(3)#2   | 102.46(15) | O(8)-P(2)-O(7) | 107.9(3) |
| F(1)-K(1)-O(6)#2   | 150.31(13) | O(9)-P(2)-O(6) | 109.4(3) |
| F(1)#1-K(1)-O(6)#2 | 100.23(11) | O(9)-P(2)-O(7) | 110.1(3) |
| F(1)-K(1)-O(9)#2   | 101.18(14) | O(9)-P(2)-O(8) | 116.3(3) |

Symmetry transformations used to generate equivalent atoms:

|                       |                        |                         |                       |
|-----------------------|------------------------|-------------------------|-----------------------|
| #1 $x, -y+1/2, z-1/2$ | #2 $x, y, z-1$         | #3 $-x+1, -y+1, -z+1$   | #4 $x, -y+3/2, z+1/2$ |
| #5 $x, -y+3/2, z-1/2$ | #6 $-x, y+1/2, -z+3/2$ | #7 $-x, -y+1, -z+2$     | #8 $x, y, z+1$        |
| #9 $x, -y+1/2, z+1/2$ | #10 $-x+1, -y+1, -z+2$ | #11 $-x, y-1/2, -z+3/2$ |                       |

Table S6. Selected bond lengths (Å) and angles (deg.) for Rb<sub>3</sub>B<sub>2</sub>PO<sub>5</sub>F<sub>4</sub>.

|                     |            |                     |            |
|---------------------|------------|---------------------|------------|
| Rb(1)-O(1)#2        | 2.888(3)   | Rb(3)-O(2)#9        | 3.174(4)   |
| Rb(1)-O(2)#2        | 3.034(4)   | Rb(3)-O(2)#10       | 2.919(3)   |
| Rb(1)-O(3)#3        | 2.868(4)   | Rb(3)-O(3)#9        | 3.055(4)   |
| Rb(1)-O(5)#1        | 2.885(4)   | Rb(3)-O(4)#10       | 3.203(4)   |
| Rb(1)-F(1)          | 2.829(3)   | Rb(3)-F(1)#8        | 2.975(3)   |
| Rb(1)-F(1)#1        | 3.105(3)   | Rb(3)-F(2)#11       | 3.014(3)   |
| Rb(1)-F(2)          | 3.048(3)   | Rb(3)-F(3)#10       | 3.222(4)   |
| Rb(1)-F(3)#4        | 2.888(3)   | Rb(3)-F(4)          | 2.898(3)   |
| Rb(1)-F(4)#1        | 3.302(3)   | B(1)-O(4)           | 1.446(6)   |
| Rb(2)-O(2)          | 2.821(3)   | B(1)-O(5)           | 1.400(6)   |
| Rb(2)-O(3)#7        | 2.939(4)   | B(1)-F(3)           | 1.426(6)   |
| Rb(2)-O(4)#5        | 3.079(3)   | B(1)-F(4)           | 1.421(6)   |
| Rb(2)-O(4)#7        | 3.295(4)   | B(2)-O(1)           | 1.458(6)   |
| Rb(2)-O(5)#6        | 2.909(4)   | B(2)-O(5)           | 1.417(6)   |
| Rb(2)-F(2)#6        | 3.027(3)   | B(2)-F(1)           | 1.423(6)   |
| Rb(2)-F(3)#5        | 3.274(4)   | B(2)-F(2)           | 1.419(6)   |
| Rb(2)-F(3)#6        | 3.294(4)   | P(1)-O(1)           | 1.574(3)   |
| Rb(2)-F(4)#7        | 2.951(3)   | P(1)-O(2)           | 1.487(4)   |
| Rb(2)-F(4)#5        | 3.048(3)   | P(1)-O(3)           | 1.482(4)   |
| Rb(3)-O(1)#8        | 2.964(3)   | P(1)-O(4)           | 1.581(4)   |
| O(1)#2-Rb(1)-O(2)#2 | 49.45(9)   | F(1)-Rb(1)-F(4)#1   | 134.55(8)  |
| O(1)#2-Rb(1)-F(1)#1 | 147.07(9)  | F(1)#1-Rb(1)-F(4)#1 | 83.15(7)   |
| O(1)#2-Rb(1)-F(2)   | 75.10(9)   | F(2)-Rb(1)-F(1)#1   | 86.34(8)   |
| O(1)#2-Rb(1)-F(4)#1 | 111.30(8)  | F(2)-Rb(1)-F(4)#1   | 168.02(8)  |
| O(2)#2-Rb(1)-F(1)#1 | 122.85(9)  | F(3)#4-Rb(1)-O(1)#2 | 81.25(10)  |
| O(2)#2-Rb(1)-F(2)   | 116.83(9)  | F(3)#4-Rb(1)-O(2)#2 | 72.76(10)  |
| O(2)#2-Rb(1)-F(4)#1 | 65.13(8)   | F(3)#4-Rb(1)-F(1)#1 | 66.94(9)   |
| O(3)#3-Rb(1)-O(1)#2 | 97.21(10)  | F(3)#4-Rb(1)-F(2)   | 71.09(10)  |
| O(3)#3-Rb(1)-O(2)#2 | 101.74(11) | F(3)#4-Rb(1)-F(4)#1 | 99.36(10)  |
| O(3)#3-Rb(1)-O(5)#1 | 81.61(10)  | O(5)-B(1)-O(4)      | 115.4(4)   |
| O(3)#3-Rb(1)-F(1)#1 | 115.31(10) | O(5)-B(1)-F(3)      | 111.8(4)   |
| O(3)#3-Rb(1)-F(2)   | 114.29(10) | O(5)-B(1)-F(4)      | 109.8(4)   |
| O(3)#3-Rb(1)-F(3)#4 | 173.92(12) | F(3)-B(1)-O(4)      | 107.0(4)   |
| O(3)#3-Rb(1)-F(4)#1 | 75.66(10)  | F(4)-B(1)-O(4)      | 107.2(4)   |
| O(5)#1-Rb(1)-O(1)#2 | 154.10(10) | F(4)-B(1)-F(3)      | 105.1(4)   |
| O(5)#1-Rb(1)-O(2)#2 | 105.21(10) | O(5)-B(2)-O(1)      | 113.6(4)   |
| O(5)#1-Rb(1)-F(1)#1 | 45.52(8)   | O(5)-B(2)-F(1)      | 110.0(4)   |
| O(5)#1-Rb(1)-F(2)   | 129.10(9)  | O(5)-B(2)-F(2)      | 111.8(4)   |
| O(5)#1-Rb(1)-F(3)#4 | 97.19(11)  | F(1)-B(2)-O(1)      | 108.2(4)   |
| O(5)#1-Rb(1)-F(4)#1 | 43.16(8)   | F(2)-B(2)-O(1)      | 107.5(4)   |
| F(1)-Rb(1)-O(1)#2   | 110.98(9)  | F(2)-B(2)-F(1)      | 105.3(4)   |
| F(1)-Rb(1)-O(2)#2   | 160.00(9)  | O(1)-P(1)-O(4)      | 103.57(19) |

|                   |            |                |          |
|-------------------|------------|----------------|----------|
| F(1)-Rb(1)-O(3)#3 | 83.30(10)  | O(2)-P(1)-O(1) | 108.2(2) |
| F(1)-Rb(1)-O(5)#1 | 94.64(9)   | O(2)-P(1)-O(4) | 108.6(2) |
| F(1)-Rb(1)-F(1)#1 | 70.14(10)  | O(3)-P(1)-O(1) | 110.6(2) |
| F(1)-Rb(1)-F(2)   | 45.05(8)   | O(3)-P(1)-O(2) | 116.0(2) |
| F(1)-Rb(1)-F(3)#4 | 102.75(10) | O(3)-P(1)-O(4) | 109.0(2) |

Symmetry transformations used to generate equivalent atoms:

|                           |                        |                          |                          |
|---------------------------|------------------------|--------------------------|--------------------------|
| #1 $-x+1, -y+1, -z+1$     | #2 $-x, -y+1, -z+1$    | #3 $x, -y+3/2, z-1/2$    | #4 $x, -y+1/2, z-1/2$    |
| #5 $-x, -y+1, -z+2$       | #6 $-x, y+1/2, -z+3/2$ | #7 $x-1, y, z$           | #8 $-x+1, y-1/2, -z+3/2$ |
| #9 $-x+1, -y+1, -z+2$     | #10 $x+1, y, z$        | #11 $x+1, -y+1/2, z+1/2$ | #12 $-x, y-1/2, -z+3/2$  |
| #13 $-x+1, y+1/2, -z+3/2$ | #14 $x, -y+3/2, z+1/2$ | #15 $x-1, -y+1/2, z-1/2$ | #16 $x, -y+1/2, z+1/2$   |

Table S7. Assignment of the absorption peaks observed in the IR spectrum of  $\text{Rb}_3\text{B}_2\text{PO}_5\text{F}_4$ :

| Mode description                                                                                 | Absorption peaks ( $\text{cm}^{-1}$ ) for $\text{Rb}_3\text{B}_2\text{PO}_5\text{F}_4$ |
|--------------------------------------------------------------------------------------------------|----------------------------------------------------------------------------------------|
| $\nu_s(\text{PO}_4)$ , $\nu_{\text{as}}(\text{BO}_2\text{F}_2)$ , $\nu_{\text{as}}(\text{ring})$ | 1200, 1150, 1038, 949                                                                  |
| $\nu_s(\text{BO}_2\text{F}_2)$ , $\delta(\text{PO}_4)$                                           | 918, 791, 698, 606, 567                                                                |
| $\delta(\text{BO}_2\text{F}_2)$                                                                  | 528, 486                                                                               |

Table S8. Assignment of the absorption peaks observed in the IR spectrum of Cs<sub>3</sub>B<sub>3</sub>P<sub>4</sub>O<sub>16</sub>:

| Mode description                               | Absorption peaks (cm <sup>-1</sup> ) for Cs <sub>3</sub> B <sub>3</sub> P <sub>4</sub> O <sub>16</sub> |
|------------------------------------------------|--------------------------------------------------------------------------------------------------------|
| $\nu_s(\text{PO}_4)$                           | 1250, 1227                                                                                             |
| $\nu_{as}(\text{BO}_4), \nu_{as}(\text{ring})$ | 1157, 1088, 991                                                                                        |
| $\delta(\text{B-O-P})$                         | 868, 791                                                                                               |
| $\nu_s(\text{BO}_4), \delta(\text{PO}_4)$      | 891, 679, 640                                                                                          |
| $\delta(\text{O-P-O})$                         | 548                                                                                                    |
| $\delta(\text{BO}_4)$                          | 490, 432                                                                                               |

Table S9. Assignment of the absorption peaks observed in the IR spectrum of  $\text{Li}(\text{NH}_4)_2\text{B}_3\text{P}_4\text{O}_{16}$ :

| Mode description                               | Absorption peaks ( $\text{cm}^{-1}$ ) for $\text{Li}(\text{NH}_4)_2\text{B}_3\text{P}_4\text{O}_{16}$ |
|------------------------------------------------|-------------------------------------------------------------------------------------------------------|
| $\nu_s(\text{PO}_4)$                           | 1265, 1238                                                                                            |
| $\nu_{as}(\text{BO}_4), \nu_{as}(\text{ring})$ | 1103, 1034, 991, 933                                                                                  |
| $\delta(\text{B-O-P})$                         | 845, 690                                                                                              |
| $\nu_s(\text{BO}_4), \delta(\text{PO}_4)$      | 910, 605                                                                                              |
| $\delta(\text{O-P-O})$                         | 563                                                                                                   |
| $\delta(\text{BO}_4)$                          | 486, 443                                                                                              |



Table S10. Assignment of the absorption peaks observed in the IR spectrum of  $K_4B_2P_2O_9F_2$ :

| Mode description                     | Absorption peaks ( $cm^{-1}$ ) for $K_4B_2P_2O_9F_2$ |
|--------------------------------------|------------------------------------------------------|
| $\nu_s(PO_4)$                        | 1226, 1203                                           |
| $\nu_{as}(BO_3F)$ , $\nu_{as}(ring)$ | 1103, 1062, 990                                      |
| $\delta(B-O-P)$                      | 845, 714                                             |
| $\nu_s(BO_3F)$ , $\delta(PO_4)$      | 953, 781, 645                                        |
| $\delta(O-P-O)$                      | 563, 536                                             |
| $\delta(BO_3F)$                      | 491, 459                                             |

Fig. S1. The PXRD patterns of (a)  $\text{Cs}_3\text{B}_3\text{P}_4\text{O}_{16}$ , (b)  $\text{Li}(\text{NH}_4)_2\text{B}_3\text{P}_4\text{O}_{16}$ , (c)  $\text{K}_4\text{B}_2\text{P}_2\text{O}_9\text{F}_2$  and (d)  $\text{Rb}_3\text{B}_2\text{PO}_5\text{F}_4$ , respectively.

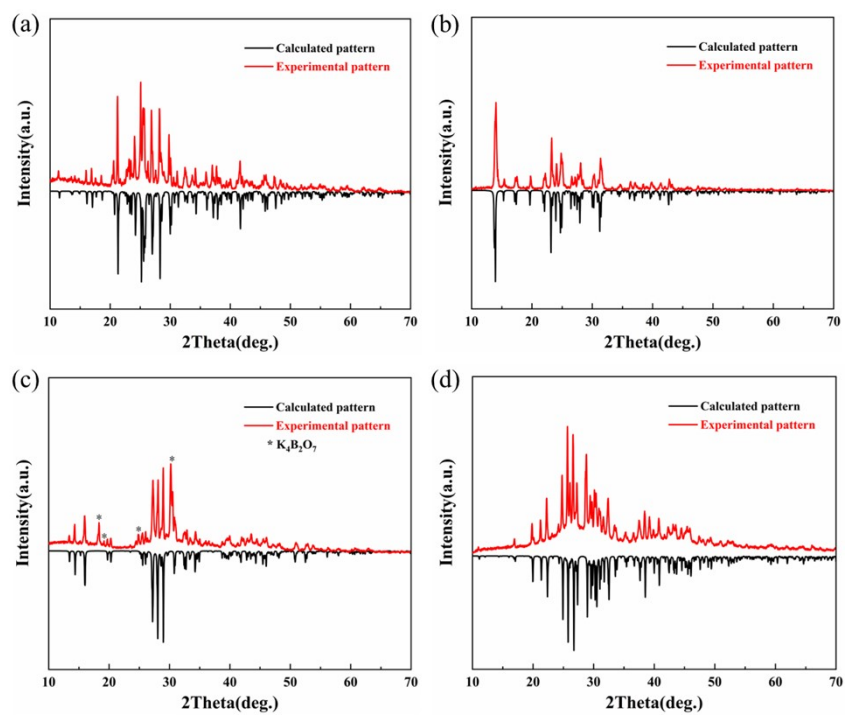

Fig. S2. The coordination of Cs(1), Cs(2) and Cs(3) in  $\text{Cs}_3\text{B}_3\text{P}_4\text{O}_{16}$ .

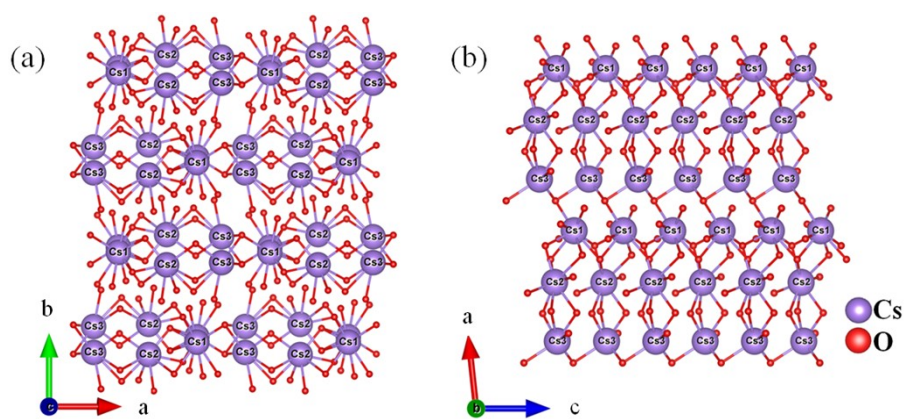

Fig. S3. The isolated  $[\text{LiO}_4]$  and  $[\text{NH}_4]$  units in  $\text{Li}(\text{NH}_4)_2\text{B}_3\text{P}_4\text{O}_{16}$ .

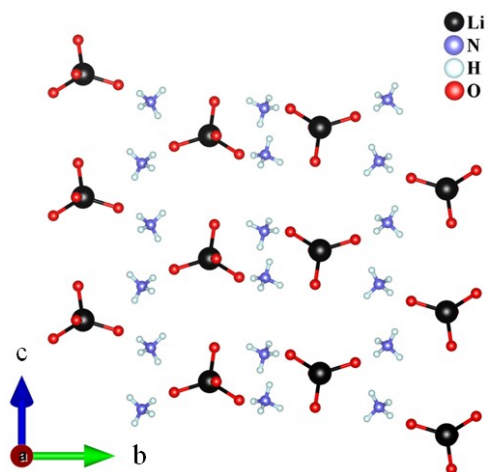

Fig. S4. The coordination of  $K^+$  cations in  $K_4B_2P_2O_9F_2$ , (a)  $[K(1)O_6F_2]$ , (b)  $[K(2)O_7F_2]$ , (c)  $[K(3)O_6F]$  and (d)  $[K(4)O_7F]$ .

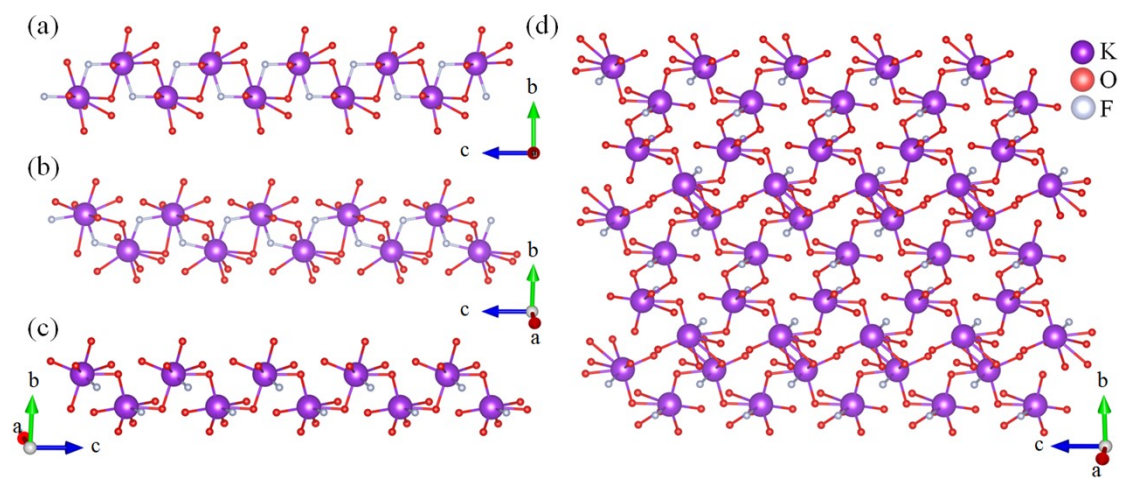

Fig. S5. The coordination of (a) Rb(1), (b) Rb(2) and (c) Rb(3) in  $\text{Rb}_3\text{B}_2\text{PO}_5\text{F}_4$ , respectively.

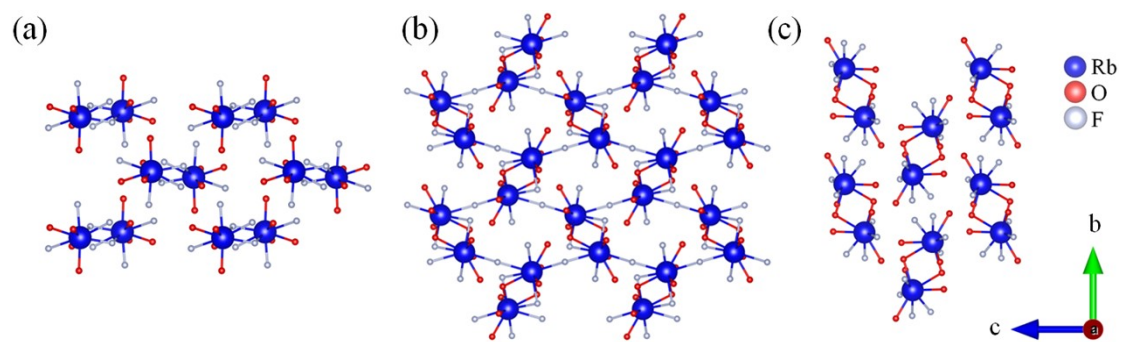

Fig. S6. The IR spectra of the title compounds.

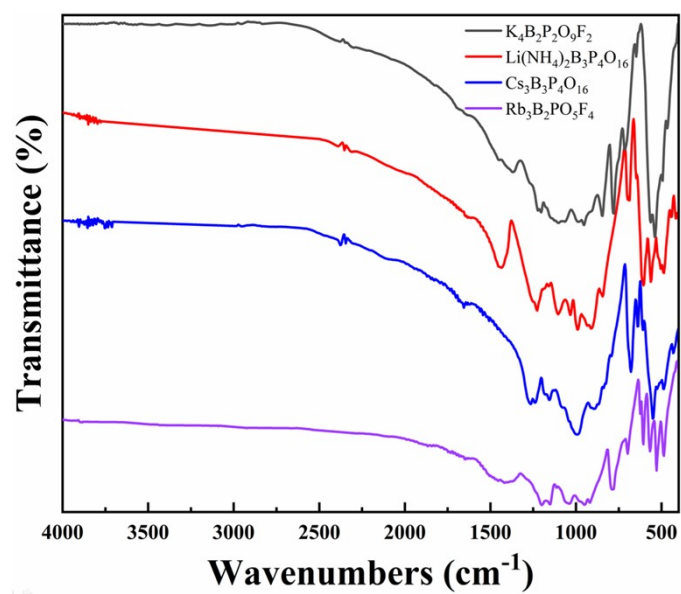

Fig. S7. UV–Vis–NIR diffuse reflectance spectra of (a)  $\text{Cs}_3\text{B}_3\text{P}_4\text{O}_{16}$ , (b)  $\text{Li}(\text{NH}_4)_2\text{B}_3\text{P}_4\text{O}_{16}$ , (c)  $\text{K}_4\text{B}_2\text{P}_2\text{O}_9\text{F}_2$  and (d)  $\text{Rb}_3\text{B}_2\text{PO}_5\text{F}_4$ , respectively.

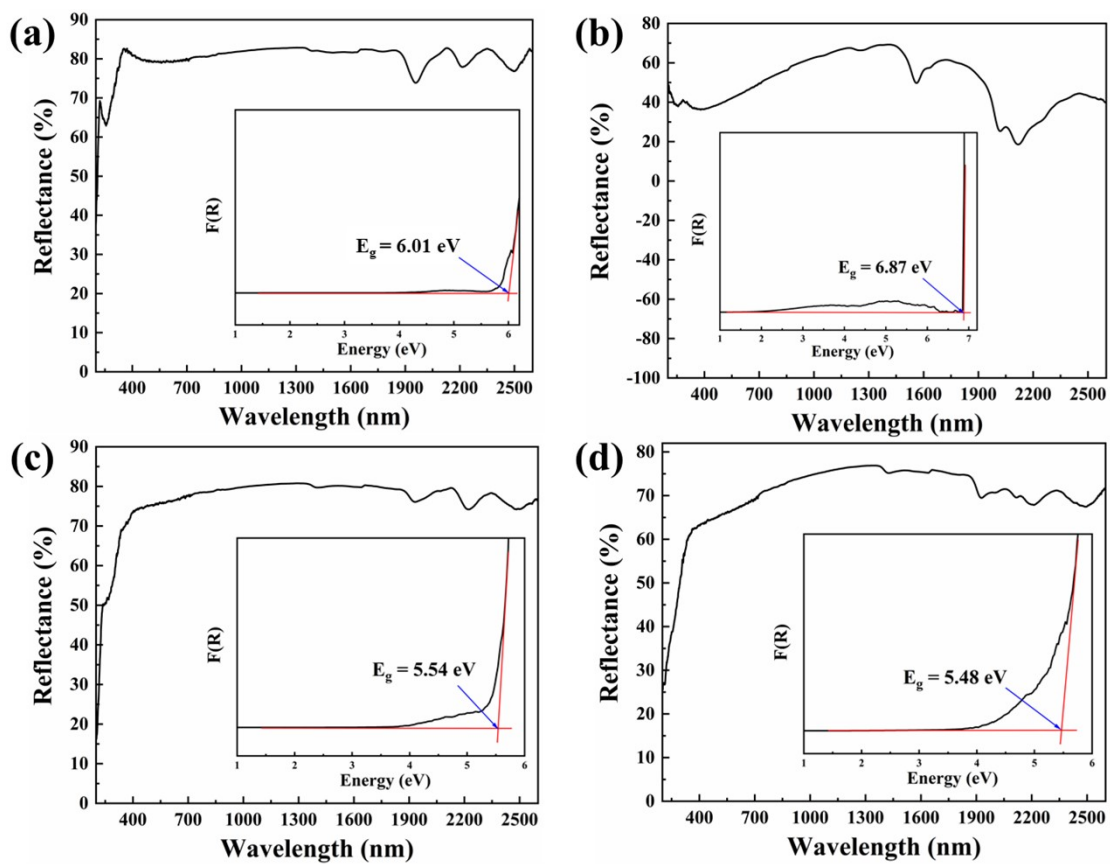



Fig. S8. Heyd–Scuseria–Ernzerhof (HSE06) hybrid functional implemented in PWmat code was performed to calculate band gap. Band structures (HSE06) of (a)  $\text{Cs}_3\text{B}_3\text{P}_4\text{O}_{16}$ , (b)  $\text{Li}(\text{NH}_4)_2\text{B}_3\text{P}_4\text{O}_{16}$ , (c)  $\text{K}_4\text{B}_2\text{P}_2\text{O}_9\text{F}_2$  and (d)  $\text{Rb}_3\text{B}_2\text{PO}_5\text{F}_4$ , respectively.

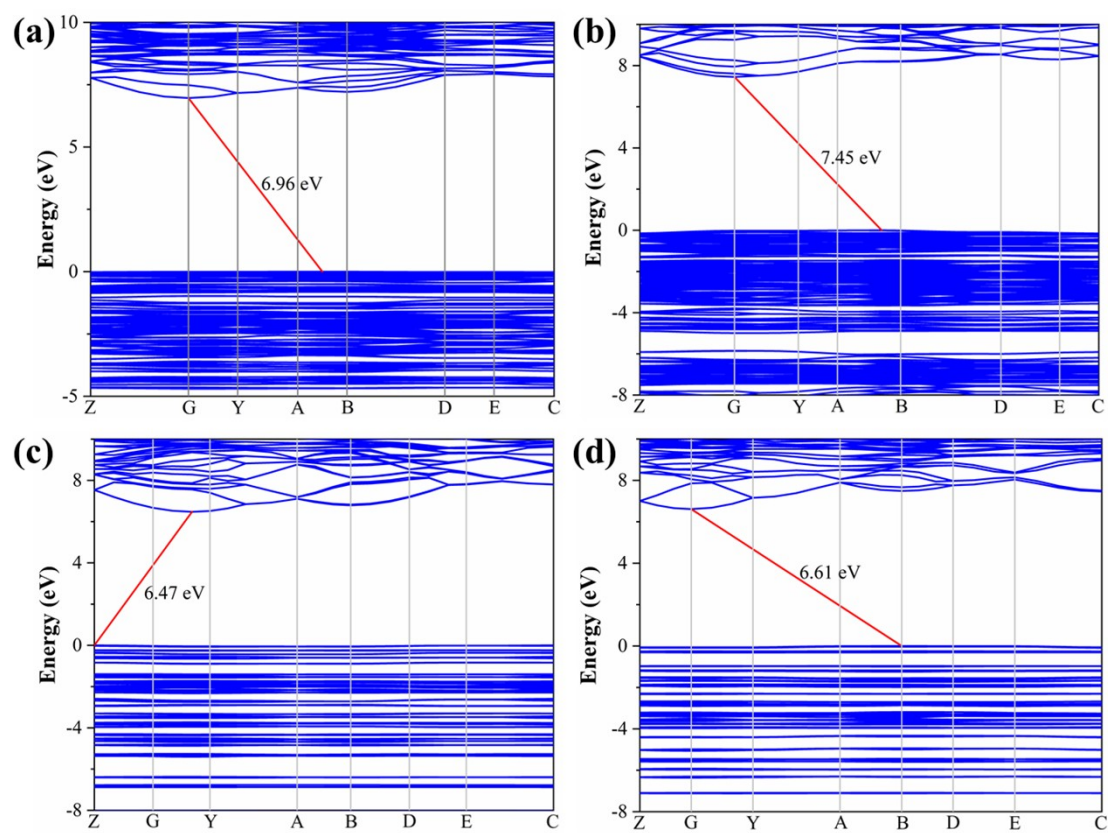

Supplement: d1dt04266a1.pdf [file d1dt04266a1.pdf]
